# Supplementary material for: Epigenetic Regulation in Exposome-Induced Tumorigenesis: Emerging Roles of ncRNAs
Source: MDPI journal article supplement (doi:10.3390/biom12040513), 2022-03-28
Supplement: s1 [file s1]

## References:

- Agency for Toxic Substances and Disease Registry. (2020). ToxFAQs™ for DDT, DDE, and DDD. <https://wwwn.cdc.gov/TSP/ToxFAQs/ToxFAQsDetails.aspx?faqid=80&toxid=20>
- Agency for Toxic Substances and Disease Registry. (2014). *Polychlorinated Biphenyls (PCBs) Toxicity*. [https://www.atsdr.cdc.gov/csem/polychlorinated-biphenyls/adverse\\_health.html](https://www.atsdr.cdc.gov/csem/polychlorinated-biphenyls/adverse_health.html)
- American Cancer Society. (2022). *Perfluorooctanoic Acid (PFOA), Teflon, and Related Chemicals*. <https://www.cancer.org/cancer/cancer-causes/teflon-and-perfluorooctanoic-acid-pfoa.html>
- Alli, L.(2015).Blood level of cadmium and lead in occupationally exposed persons in Gwagwalada, Abuja, Nigeria. *Interdisciplinary Toxicology*,8(3) 146-150. <https://doi.org/10.1515/intox-2015-0022>
- Alvarado, A; Blanco, R. & Mora, E. (2002). El cromo como elemento esencial en los humanos. *Revista Costarricense de Ciencias Médicas*, 23(1-2), 55-68.
- Anyanwu, B. O., & Orisakwe, O. E. (2020). Current mechanistic perspectives on male reproductive toxicity induced by heavy metals. *Journal of environmental science and health. Part C, Toxicology and Carcinogenesis*, 38(3), 204–244. <https://doi.org/10.1080/26896583.2020.1782116>
- Avissar-Whiting, M., Veiga, K. R., Uhl, K. M., Maccani, M. A., Gagne, L. A., Moen, E. L., & Marsit, C. J. (2010). Bisphenol A exposure leads to specific microRNA alterations in placental cells. *Reproductive Toxicology* (Elmsford, N.Y.), 29(4), 401–406. <https://doi.org/10.1016/j.reprotox.2010.04.004>
- Awadalla, A., Mortada, W. I., Abol-Enein, H., & Shokeir, A. A. (2020). Correlation between blood levels of cadmium and lead and the expression of microRNA-21 in Egyptian bladder cancer patients. *Heliyon*, 6(12), e05642. <https://doi.org/10.1016/j.heliyon.2020.e05642>
- Bae, H. S., Ryu, D. Y., Choi, B. S., & Park, J. D. (2013). Urinary Arsenic Concentrations and their Associated Factors in Korean Adults. *Toxicological Research*, 29(2), 137–142. <https://doi.org/10.5487/TR.2013.29.2.137>
- Baker, B. A., Cassano, V. A., Murray, C., & ACOEM Task Force on Arsenic Exposure (2018). Arsenic Exposure, Assessment, Toxicity, Diagnosis, and Management: Guidance for Occupational and Environmental Physicians. *Journal of Occupational and Environmental Medicine*, 60(12), e634–e639. <https://doi.org/10.1097/JOM.0000000000001485>
- Beck, R., Bommarito, P., Douillet, C., Kanke, M., Del Razo, L. M., García-Vargas, G., Fry, R. C., Sethupathy, P., & Stýblo, M. (2018). Circulating miRNAs Associated with Arsenic Exposure. *Environmental Science & Technology*, 52(24), 14487–14495. <https://doi.org/10.1021/acs.est.8b06457>
- Blockhuys, S., & Wittung-Stafshede, P.. (2017). Roles of Copper-Binding Proteins in Breast Cancer. *International Journal of Molecular Sciences*, 18(4), 871. <https://doi.org/10.3390/ijms18040871>
- Boffetta, P., Jourenkova, N. & Gustavsson, P. (1997). Riesgo de cáncer por exposición ocupacional y ambiental a hidrocarburos aromáticos policíclicos. *Cancer Causes Control* 8, 444–472
- Born, S.C. (2012). Chapter 62. dioxins. Olson K.R.(Ed.), *Poisoning & Drug Overdose*, 6e. McGraw Hill. <https://accessmedicine.mhmedical.com/content.aspx?bookid=391&sectionid=42069876>
- Bouwman, H., Becker, P. J., & Schutte, C. H. (1994). Malaria control and longitudinal changes in levels of DDT and its metabolites in human serum from KwaZulu. *Bulletin of the World Health Organization*, 72(6), 921–930.
- Brucker, N., Charão, M. F., Moro, A. M., Ferrari, P., Bubols, G., Sauer, E., Fracasso, R., Durgante, J., Thiesen, F. V., Duarte, M. M., Gioda, A., Castro, I., Saldiva, P. H., & Garcia, S. C. (2014). Atherosclerotic process in taxi drivers occupationally exposed to air pollution and co-morbidities. *Environmental Research*, 131, 31–38. <https://doi.org/10.1016/j.envres.2014.02.012>
- Burstyn, I., Kromhout, H., Partanen, T., Svane, O., Langård, S., Ahrens, W., Kauppinen, T., Stücker, I., Shaham, J., Heederik, D., Ferro, G., Heikkilä, P., Hooiveld, M., Johansen, C., Randem, B. G., & Boffetta, P. (2005). Polycyclic aromatic hydrocarbons and fatal ischemic heart disease. *Epidemiology* (Cambridge, Mass.), 16(6), 744–750. <https://doi.org/10.1097/01.ede.0000181310.65043.2f>
- CDC. (2009). *Polycyclic Aromatic Hydrocarbons (PAHs)*. Centers for Disease Control and Prevention. [https://www.epa.gov/sites/default/files/2014-03/documents/pahs\\_factsheet\\_cdc\\_2013.pdf](https://www.epa.gov/sites/default/files/2014-03/documents/pahs_factsheet_cdc_2013.pdf)
- CDC. (2009a). *Dichlorodiphenyltrichloroethane (DDT)*. Centers for Disease Control and Prevention.

[https://www.cdc.gov/biomonitoring/pdf/ddt\\_factsheet.pdf](https://www.cdc.gov/biomonitoring/pdf/ddt_factsheet.pdf)

- CDC. (2014). *Lead compounds (as Pb)*. Centers for Disease Control and Prevention. <https://www.cdc.gov/niosh/idlh/7439921.html>
- CDC. (2014a). *Smoking and cardiovascular disease*. Centers for Disease Control and Prevention. [https://www.cdc.gov/tobacco/data\\_statistics/sgr/50th-anniversary/pdfs/fs\\_smoking\\_CVD\\_508.pdf](https://www.cdc.gov/tobacco/data_statistics/sgr/50th-anniversary/pdfs/fs_smoking_CVD_508.pdf)
- CDC. (2016). *ToxFAQs™ - DDT, DDE y DDD*. Centers for Disease Control and Prevention. [https://www.atsdr.cdc.gov/es/toxfaqs/es\\_tfacts35.html](https://www.atsdr.cdc.gov/es/toxfaqs/es_tfacts35.html)
- CDC. (2017). *Bisphenol A (BPA) Factsheet*. Centers for Disease Control and Prevention. [https://www.cdc.gov/biomonitoring/BisphenolA\\_FactSheet.html](https://www.cdc.gov/biomonitoring/BisphenolA_FactSheet.html)
- CDC. (2020). *Sources of Lead Exposure*. Centers for Disease Control and Prevention. <https://www.cdc.gov/nceh/lead/prevention/sources.htm>
- CDC. (2021). *Health Effects of Cigarette Smoking*. Centers for Disease Control and Prevention. [https://www.cdc.gov/tobacco/data\\_statistics/fact\\_sheets/health\\_effects/effects\\_cig\\_smoking/index.htm](https://www.cdc.gov/tobacco/data_statistics/fact_sheets/health_effects/effects_cig_smoking/index.htm)
- CDC. (2021a). *Phthalates Factsheet*. Centers for Disease Control and Prevention. [https://www.cdc.gov/biomonitoring/Phthalates\\_FactSheet.html](https://www.cdc.gov/biomonitoring/Phthalates_FactSheet.html)
- Chuang, S. C., Chen, H. C., Sun, C. W., Chen, Y. A., Wang, Y. H., Chiang, C. J., Chen, C. C., Wang, S. L., Chen, C. J., & Hsiung, C. A. (2020). Phthalate exposure and prostate cancer in a population-based nested case-control study. *Environmental Research*, 181, 108902. <https://doi.org/10.1016/j.envres.2019.108902>
- Cobellis, L., Colacurci, N., Trabucco, E., Carpentiero, C., & Grumetto, L. (2009). Measurement of bisphenol A and bisphenol B levels in human blood sera from healthy and endometriotic women. *Biomedical chromatography : BMC*, 23(11), 1186–1190. <https://doi.org/10.1002/bmc.1241>
- Cohn, B. A., Wolff, M. S., Cirillo, P. M., & Sholtz, R. I. (2007). DDT and breast cancer in young women: new data on the significance of age at exposure. *Environmental Health Perspectives*, 115(10), 1406–1414. <https://doi.org/10.1289/ehp.10260>
- Collaborative on Health and the Environment. (2019). *Arsenic*. <https://www.healthandenvironment.org/environmental-health/environmental-risks/chemical-environment-overview/arsenic>
- Craig, S. (2012). Chapter 78. Glyphosate. In: Olson, K.R. *Poisoning & Drug Overdose*, 6e. McGrawHill.
- Dann, A. B., & Hontela, A. (2011). Triclosan: environmental exposure, toxicity and mechanisms of action. *Journal of applied Toxicology : JAT*, 31(4), 285–311. <https://doi.org/10.1002/jat.1660>
- Deng, Q., Huang, S., Zhang, X., Zhang, W., Feng, J., Wang, T., Hu, D., Guan, L., Li, J., Dai, X., Deng, H., Zhang, X., & Wu, T. (2014). Plasma microRNA expression and micronuclei frequency in workers exposed to polycyclic aromatic hydrocarbons. *Environmental Health Perspectives*, 122(7), 719–725. <https://doi.org/10.1289/ehp.1307080>
- Dinwiddie, M., Terry, P., & Chen, J. (2014). Recent Evidence Regarding Triclosan and Cancer Risk. *International Journal of Environmental Research and Public Health*, 11(2), 2209–2217. <https://doi.org/10.3390/ijerph110202209>
- Dioni, L., Sucato, S., Motta, V., Iodice, S., Angelici, L., Favero, C., Cavalleri, T., Vigna, L., Albetti, B., Fustinoni, S., Bertazzi, P., Pesatori, A., & Bollati, V. (2017). Urinary chromium is associated with changes in leukocyte miRNA expression in obese subjects. *European Journal of Clinical Nutrition*, 71(1), 142–148. <https://doi.org/10.1038/ejcn.2016.197>
- Du, Z., Chai, X., Li, X., Ren, G., Yang, X., & Yang, Z. (2022). Nano-CuO causes cell damage through activation of dose-dependent autophagy and mitochondrial IncCyt b-AS/ND5-AS/ND6-AS in SH-SY5Y cells. *Toxicology Mechanisms and Methods*, 32(1), 37–48. <https://doi.org/10.1080/15376516.2021.1964665>
- Falagan-Lotsch, P., & Murphy, C. J. (2020). Network-based analysis implies critical roles of microRNAs in the long-term cellular responses to gold nanoparticles. *Nanoscale*, 12(41), 21172–21187. <https://doi.org/10.1039/d0nr04701e>
- Gao, H., Yang, B. J., Li, N., Feng, L. M., Shi, X. Y., Zhao, W. H., & Liu, S. J. (2015). Bisphenol A and hormone-associated cancers: current progress and perspectives. *Medicine*, 94(1), e211. <https://doi.org/10.1097/MD.0000000000000211>
- Garshick, E., Laden, F., Hart, J. E., Davis, M. E., Eisen, E. A., & Smith, T. J. (2012). Lung cancer and elemental carbon exposure in trucking industry workers. *Environmental Health Perspectives*, 120(9), 1301–1306. <https://doi.org/10.1289/ehp.1204989>
- Gaum, P. M., Gube, M., Schettgen, T., Putschögl, F. M., Kraus, T., Fimm, B., & Lang, J. (2017). Polychlorinated biphenyls and

- depression: cross-sectional and longitudinal investigation of a dopamine-related Neurochemical path in the German HELPeB surveillance program. *Environmental Health*, 16(1). <https://doi.org/10.1186/s12940-017-0316-3>
- Gerona, R. R., Pan, J., Zota, A. R., Schwartz, J. M., Friesen, M., Taylor, J. A., Hunt, P. A., & Woodruff, T. J. (2016). Direct measurement of Bisphenol A (BPA), BPA glucuronide and BPA sulfate in a diverse and low-income population of pregnant women reveals high exposure, with potential implications for previous exposure estimates: a cross-sectional study. *Environmental Health : a global access science source*, 15, 50. <https://doi.org/10.1186/s12940-016-0131-2>
- Gonskikh, Y., Gerstl, M., Kos, M., Borth, N., Schosserer, M., Grillari, J., & Polacek, N.. (2020). Modulation of mammalian translation by a ribosome-associated tRNA half. *RNA Biology*, 17(8), 1125–1136. <https://doi.org/10.1080/15476286.2020.1744296>
- Government of Spain. (2020). DDT. <https://prtr-es.es/DDT,15620,11,2007.html>
- Harari, F., Barregard, L., Östling, G., Sallsten, G., Hedblad, B., Forsgard, N., Borné, Y., Fagerberg, B., & Engström, G. (2019). Blood Lead Levels and Risk of Atherosclerosis in the Carotid Artery: Results from a Swedish Cohort. *Environmental Health Perspectives*, 127(12), 127002. <https://doi.org/10.1289/EHP5057>
- Hollensteiner, J., Schneider, D., Poehlein, A., & Daniel, R.. (2020). Complete Genome of *Roseobacter ponti* DSM 106830T. *Genome Biology and Evolution*, 12(7), 1013–1018. <https://doi.org/10.1093/gbe/evaa114>
- Hong, Y. S., Song, K. H., & Chung, J. Y. (2014). Health effects of chronic arsenic exposure. *Journal of Preventive Medicine and Public Health = Yebang Uihakhoe chi*, 47(5), 245–252. <https://doi.org/10.3961/jpmph.14.035>
- Iida, T., & Todaka, T. (2003). Measurement of dioxins in human blood: improvement of analytical method. *Industrial health*, 41(3), 197–204. <https://doi.org/10.2486/indhealth.41.197>
- Kalinina, T.S., Kononchuk, V.V., Ovchinnikov, V.Y. et al. (2018). Expression of the miR-190 family is increased under DDT exposure in vivo and in vitro. *Molecular Biology Reports*, 45, 1937–1945 <https://doi.org/10.1007/s11033-018-4343-0>
- Kim, J. H., Cho, Y. H., & Hong, Y. C. (2020). MicroRNA expression in response to bisphenol A is associated with high blood pressure. *Environment International*, 141, 105791. <https://doi.org/10.1016/j.envint.2020.105791>
- Konieczna, A., Rutkowska, A., & Rachoń, D. (2015). Health risk of exposure to Bisphenol A (BPA). *Roczniki Panstwowego Zakladu Higieny*, 66(1), 5–11.
- Lee, H. W., Jose, C. C., & Cuddapah, S. (2021). Epithelial-mesenchymal transition: Insights into nickel-induced lung diseases. *Seminars in Cancer Biology*, 76, 99–109. <https://doi.org/10.1016/j.semcancer.2021.05.020>
- Lee, T.-W., Kim, D. H., & Ryu, J. Y.. (2020). Association between urinary polycyclic aromatic hydrocarbons and hypertension in the Korean population: data from the Second Korean National Environmental Health Survey (2012–2014). *Scientific Reports*, 10(1). <https://doi.org/10.1038/s41598-020-74353-w>
- Lim, J. H., Song, M. K., Cho, Y., Kim, W., Han, S. O., & Ryu, J. C. (2017). Comparative analysis of microRNA and mRNA expression profiles in cells and exosomes under toluene exposure. *Toxicology in vitro : an International Journal published in association with BIBRA*, 41, 92–101. <https://doi.org/10.1016/j.tiv.2017.02.020>
- López-Carrillo, L., Hernández-Ramírez, R. U., Calafat, A. M., Torres-Sánchez, L., Galván-Portillo, M., Needham, L. L., Ruiz-Ramos, R., & Cebrián, M. E.. (2010). Exposure to Phthalates and Breast Cancer Risk in Northern Mexico. *Environmental Health Perspectives*, 118(4), 539–544. <https://doi.org/10.1289/ehp.0901091>
- Luz, A., DeLeo, P., Pechacek, N., & Freemantle, M. (2020). Human health hazard assessment of quaternary ammonium compounds: Didecyl dimethyl ammonium chloride and alkyl (C12-C16) dimethyl benzyl ammonium chloride. *Regulatory Toxicology and Pharmacology : RTP*, 116, 104717. <https://doi.org/10.1016/j.yrtph.2020.104717>
- Messerlian, C., Wylie, B. J., Mínguez-Alarcón, L., Williams, P. L., Ford, J. B., Souter, I. C., Calafat, A. M., & Hauser, R.. (2016). Urinary Concentrations of Phthalate Metabolites and Pregnancy Loss Among Women Conceiving with Medically Assisted Reproduction. *Epidemiology*, 27(6), 879–888. <https://doi.org/10.1097/ede.0000000000000525>
- Mohamed, F., Gawarammana, I., Robertson, T. A., Roberts, M. S., Palangasinghe, C., Zawahir, S., Jayamanne, S., Kandasamy, J., Eddleston, M., Buckley, N. A., Dawson, A. H., & Roberts, D. M. (2009). Acute human self-poisoning with imidacloprid compound: a neonicotinoid insecticide. *PLoS one*, 4(4), e5127. <https://doi.org/10.1371/journal.pone.0005127>
- Mundhe, S. A., Birajdar, S. V., Chavan, S. S., & Pawar, N. R. (2017). Imidacloprid Poisoning: An Emerging Cause of Potentially Fatal Poisoning. *Indian Journal of Critical Care Medicine : Peer-Reviewed, Official Publication of Indian Society of Critical Care Medicine*, 21(11), 786–788. [https://doi.org/10.4103/ijccm.IJCCM\\_152\\_17](https://doi.org/10.4103/ijccm.IJCCM_152_17)
- Muzembo, B. A., Iwai-Shimada, M., Isobe, T., Arisawa, K., Shima, M., Fukushima, T., & Nakayama, S. F. (2019). Dioxins levels in human blood after implementation of measures against dioxin exposure in Japan. *Environmental Health and Preventive Medicine*, 24(1), 6. <https://doi.org/10.1186/s12199-018-0755-7>

- Nassan, F. L., Mínguez-Alarcón, L., Williams, P. L., Dadd, R., Petrozza, J. C., Ford, J. B., Calafat, A. M., Hauser, R., & EARTH Study Team (2019). Urinary triclosan concentrations and semen quality among men from a fertility clinic. *Environmental Research*, 177, 108633. <https://doi.org/10.1016/j.envres.2019.108633>
- National Academy of Sciences. (2008). 2 Phthalate Exposure Assessment in Humans. In: Phthalates and Cumulative Risk Assessment: The Tasks Ahead. <https://www.ncbi.nlm.nih.gov/books/NBK215044/>
- National Institute of Environmental Health Science. (2021). *Bisphenol A (BPA)*. <https://www.niehs.nih.gov/health/topics/agents/sya-bpa/index.cfm>
- National Research Council (US) Committee on Measuring Lead in Critical Populations. Measuring Lead Exposure in Infants, Children, and Other Sensitive Populations. Washington (DC): National Academies Press (US). (1993). 2, Adverse Health Effects of Exposure to Lead. Available from: <https://www.ncbi.nlm.nih.gov/books/NBK236465>
- New Jersey Department of Health. (2010). *Hazardous Substance Fact Sheet*. <https://nj.gov/health/eoh/rtkweb/documents/fs/0709.pdf>
- Oregon State University. (2010). *Imidacloprid*. <http://npic.orst.edu/factsheets/imidagen.html#exposed>
- Papoutsopoulou, S., Satsangi, J., Campbell, B. J., & Probert, C. S.. (2020). Review article: impact of cigarette smoking on intestinal inflammation-direct and indirect mechanisms. *Alimentary Pharmacology & Therapeutics*, 51(12), 1268–1285. <https://doi.org/10.1111/apt.15774>
- Pan, X., Hu, J., Xia, W., Zhang, B., Liu, W., Zhang, C., Yang, J., Hu, C., Zhou, A., Chen, Z., Cao, J., Zhang, Y., Wang, Y., Huang, Z., Lv, B., Song, R., Zhang, J., Xu, S., & Li, Y. (2017). Prenatal chromium exposure and risk of preterm birth: a cohort study in Hubei, China. *Scientific Reports*, 7(1), 3048. <https://doi.org/10.1038/s41598-017-03106-z>
- Pan American Health Organization. (w.d.). *Arsenic*. [https://www3.paho.org/hq/index.php?option=com\\_content&view=article&id=9201:2013-arsenic&Itemid=40132&lang=es](https://www3.paho.org/hq/index.php?option=com_content&view=article&id=9201:2013-arsenic&Itemid=40132&lang=es)
- Parvez, S., Geron, R. R., Proctor, C., Friesen, M., Ashby, J. L., Reiter, J. L., Lui, Z., & Winchester, P. D. (2018). Glyphosate exposure in pregnancy and shortened gestational length: a prospective Indiana birth cohort study. *Environmental Health : a Global Access Science Source*, 17(1), 23. <https://doi.org/10.1186/s12940-018-0367-0>
- Perkins, J. T., Petriello, M. C., Newsome, B. J., & Hennig, B.. (2016). Polychlorinated biphenyls and links to cardiovascular disease. *Environmental Science and Pollution Research*, 23(3), 2160–2172. <https://doi.org/10.1007/s11356-015-4479-6>
- Persson, E. C., Graubard, B. I., Evans, A. A., London, W. T., Weber, J. P., LeBlanc, A., Chen, G., Lin, W., & McGlynn, K. A. (2012). Dichlorodiphenyltrichloroethane and risk of hepatocellular carcinoma. *International Journal of Cancer*, 131(9), 2078–2084. <https://doi.org/10.1002/ijc.27459>
- Pesatori, A. C., Consonni, D., Rubagotti, M., Grillo, P., & Bertazzi, P. A. (2009). Cancer incidence in the population exposed to dioxin after the "Seveso accident": twenty years of follow-up. *Environmental health: a global access science source*, 8, 39. <https://doi.org/10.1186/1476-069X-8-39>
- Poothong, S., Papadopoulou, E., Padilla-Sánchez, J. A., Thomsen, C., & Haug, L. S. (2020). Multiple pathways of human exposure to poly- and perfluoroalkyl substances (PFASs): From external exposure to human blood. *Environment International*, 134, 105244. <https://doi.org/10.1016/j.envint.2019.105244>
- Pozuelos, G. L., Kagda, M. S., Schick, S., Girke, T., Volz, D. C., & Talbot, P. (2019). Experimental Acute Exposure to Thirdhand Smoke and Changes in the Human Nasal Epithelial Transcriptome: A Randomized Clinical Trial. *JAMA network open*, 2(6), e196362. <https://doi.org/10.1001/jamanetworkopen.2019.6362>
- Rafati Rahimzadeh, M., Rafati Rahimzadeh, M., Kazemi, S., & Moghadamnia, A. A. (2017). Cadmium toxicity and treatment: An update. *Caspian Journal of Internal Medicine*, 8(3), 135–145. <https://doi.org/10.22088/cjim.8.3.135>
- Rezg, R., El-Fazaa, S., Gharbi, N., & Mornagui, B. (2014). Bisphenol A and human chronic diseases: current evidences, possible mechanisms, and future perspectives. *Environment International*, 64, 83–90. <https://doi.org/10.1016/j.envint.2013.12.007>
- Rivers, A. R., Burns, A. S., Chan, L. K., & Moran, M. A. (2016). Experimental Identification of Small Non-Coding RNAs in the Model Marine Bacterium *Ruegeria pomeroyi* DSS-3. *Frontiers in Microbiology*, 7, 380. <https://doi.org/10.3389/fmicb.2016.00380>
- Schechter, A., Stanley, J., Boggess, K., Masuda, Y., Mes, J., Wolff, M., Fürst, P., Fürst, C., Wilson-Yang, K., & Chisholm, B. (1994). Polychlorinated biphenyl levels in the tissues of exposed and nonexposed humans. *Environmental Health Perspectives*, 102 Suppl 1(Suppl 1), 149–158. <https://doi.org/10.1289/ehp.94102s1149>
- Shankar, A., Xiao, J., & Ducatman, A.. (2012). Perfluorooctanoic Acid and Cardiovascular Disease in US Adults. *Archives of Internal Medicine*, 172(18), 1397. <https://doi.org/10.1001/archinternmed.2012.3393>

- Shanker, A.D. & Venkateswarlu, B. (2011). Chromium: Environmental Pollution, Health Effects and Mode of Action. *Encyclopedia of Environmental Health*. 650-659, <https://doi.org/10.1016/B978-0-444-52272-6.00390-1>
- Sharma, M. K., & Kumar, M.. (2020). Sulphate contamination in groundwater and its remediation: an overview. *Environmental Monitoring and Assessment*, 192(2). <https://doi.org/10.1007/s10661-019-8051-6>
- Shelnutt, S., Kind, J., & Allaben, W. (2013). Bisphenol A: Update on newly developed data and how they address NTP's 2008 finding of "Some Concern". *Food and chemical toxicology : an international journal published for the British Industrial Biological Research Association*, 57, 284–295. <https://doi.org/10.1016/j.fct.2013.03.027>
- Shvedova, A. A., Yanamala, N., Kisin, E. R., Khailullin, T. O., Birch, M. E., & Fatkhutdinova, L. M.. (2016). Integrated Analysis of Dysregulated ncRNA and mRNA Expression Profiles in Humans Exposed to Carbon Nanotubes. *PLOS ONE*, 11(3), e0150628. <https://doi.org/10.1371/journal.pone.0150628>
- Skarha, J., Mínguez-Alarcón, L., Williams, P. L., Korevaar, T., de Poortere, R. A., Broeren, M., Ford, J. B., Eliot, M., Hauser, R., & Braun, J. M. (2019). Cross-sectional associations between urinary triclosan and serum thyroid function biomarker concentrations in women. *Environment International*, 122, 256–262. <https://doi.org/10.1016/j.envint.2018.11.015>
- Steenland, K., & Boffetta, P. (2000). Lead and cancer in humans: where are we now?. *American Journal of Industrial Medicine*, 38(3), 295–299. [https://doi.org/10.1002/1097-0274\(200009\)38:3<295::aid-ajim8>3.0.co;2-l](https://doi.org/10.1002/1097-0274(200009)38:3<295::aid-ajim8>3.0.co;2-l)
- Steenland, K., Fletcher, T., Stein, C. R., Bartell, S. M., Darrow, L., Lopez-Espinosa, M. J., Barry Ryan, P., & Savitz, D. A. (2020). Review: Evolution of evidence on PFOA and health following the assessments of the C8 Science Panel. *Environment International*, 145, 106125. <https://doi.org/10.1016/j.envint.2020.106125>
- Sun, D., Zhao, T., Long, K., Wu, M., & Zhang, Z. (2021). Triclosan down-regulates fatty acid synthase through microRNAs in HepG2 cells. *European Journal of Pharmacology*, 907, 174261. <https://doi.org/10.1016/j.ejphar.2021.174261>
- Sun, L., Xu, A., Li, M., Xia, X., Li, P., Han, R., Fei, G., Zhou, S., & Wang, R. (2021). Effect of Methylation Status of lncRNA-MALAT1 and MicroRNA-146a on Pulmonary Function and Expression Level of COX2 in Patients With Chronic Obstructive Pulmonary Disease. *Frontiers in Cell and Developmental Biology*, 9, 667624. <https://doi.org/10.3389/fcell.2021.667624>
- Tang, F., Wang, H., Chen, E., Bian, E., Xu, Y., Ji, X., Yang, Z., Hua, X., Zhang, Y., & Zhao, B. (2019). LncRNA-ATB promotes TGF- $\beta$ -induced glioma cells invasion through NF- $\kappa$ B and P38/MAPK pathway. *Journal of Cellular Physiology*, 234(12), 23302–23314. <https://doi.org/10.1002/jcp.28898>
- Tani, H., Numajiri, A., Aoki, M., Umemura, T., & Nakazato, T.. (2019). Short-lived long noncoding RNAs as surrogate indicators for chemical stress in HepG2 cells and their degradation by nuclear RNases. *Scientific Reports*, 9(1). <https://doi.org/10.1038/s41598-019-56869-y>
- University of Tennessee. (2020). Toxicity Profiles. Formal Toxicity Summary for Cadmium. <https://rais.ornl.gov/tox/profiles/cadmium.html>
- University of Tennessee. (2020a). Toxicity Profiles. Formal Toxicity Summary for Chromium. <https://rais.ornl.gov/tox/profiles/chromium.html>
- United States Environmental Protection Agency (EPA). (2021). Polychlorinated Biphenyls (PCBs). <https://www.epa.gov/pcbs/learn-about-polychlorinated-biphenyls-pcbs>
- United States Environmental Protection Agency (EPA). (2021a). PFOA, PFOS and Other PFAS. <https://www.epa.gov/pfas/pfas-explained>
- US Department of Health and Human Services. (2020). Toxicological Profile for Glyphosate. Agency for toxic Substances and Disease Registry. <https://www.atsdr.cdc.gov/toxprofiles/tp214.pdf>
- Wahlang, B., Petriello, M. C., Perkins, J. T., Shen, S., & Hennig, B.. (2016). Polychlorinated biphenyl exposure alters the expression profile of microRNAs associated with vascular diseases. *Toxicology in Vitro*, 35, 180–187. <https://doi.org/10.1016/j.tiv.2016.06.001>
- Wang, W., Shim, Y. K., Michalek, J. E., Barber, E., Saleh, L. M., Choi, B. Y., Wang, C. P., Ketchum, N., Costello, R., Marti, G. E., Vogt, R. F., Landgren, O., & Calvo, K. R. (2020). Serum microRNA profiles among dioxin exposed veterans with monoclonal gammopathy of undetermined significance. *Journal of Toxicology and Environmental Health. Part A*, 83(7), 269–278. <https://doi.org/10.1080/15287394.2020.1749919>
- Wani, A. L., Ara, A., & Usmani, J. A. (2015). Lead toxicity: a review. *Interdisciplinary Toxicology*, 8(2), 55–64.

<https://doi.org/10.1515/intox-2015-0009>

- Weatherly, L. M., & Gosse, J. A. (2017). Triclosan exposure, transformation, and human health effects. *Journal of toxicology and environmental health. Part B, Critical Reviews*, 20(8), 447–469. <https://doi.org/10.1080/10937404.2017.1399306>
- Woeller, C. F., Thatcher, T. H., Thakar, J., Cornwell, A., Smith, M. R., Jones, D. P., Hopke, P. K., Sime, P. J., Krah, P., Mallon, T. M., Phipps, R. P., & Utell, M. J. (2019). Exposure to Heptachlorodibenzo-p-dioxin (HpCDD) Regulates microRNA Expression in Human Lung Fibroblasts. *Journal of Occupational and Environmental Medicine*, 61 Suppl 12(Suppl 12), S82–S89. <https://doi.org/10.1097/JOM.0000000000001691>
- World Health Organization. Regional Office for Europe, Copenhagen, Denmark. (2000). *Chapter 6.4 Chromium*. [https://www.euro.who.int/\\_\\_data/assets/pdf\\_file/0017/123074/AQG2ndEd\\_6\\_4Chromium.PDF](https://www.euro.who.int/__data/assets/pdf_file/0017/123074/AQG2ndEd_6_4Chromium.PDF)
- World Health Organization. (2010). Preventing disease through healthy environments exposure to dioxins and dioxin-like substances: a major public health concern. <https://www.who.int/ipcs/features/dioxins.pdf>
- World Health Organization. (2019). Preventing disease through healthy environments. Exposure to cadmium: a major public health concern. <https://apps.who.int/iris/bitstream/handle/10665/329480/WHO-CED-PHE-EPE-19.4.3-eng.pdf?ua=1>
- World Health Organization. (2022). IARC Monograph on Glyphosate. <https://www.iarc.who.int/featured-news/media-centre-iarc-news-glyphosate/>
- World Health Organization, International Agency for Research on Cancer. (2022). *Triclosan (TCS) (Compound)*. <http://exposome-explorer.iarc.fr/compounds/1420>
- World Health Organization. Regional Office for Europe, Copenhagen, Denmark. (2000a). Chapter 5.10 Polychlorinated biphenyls (PCBs). [https://www.euro.who.int/\\_\\_data/assets/pdf\\_file/0016/123064/AQG2ndEd\\_5\\_10PCBs.PDF](https://www.euro.who.int/__data/assets/pdf_file/0016/123064/AQG2ndEd_5_10PCBs.PDF)
- World Health Organization. Regional Office for Europe, Copenhagen, Denmark. (2000). Chapter 8.1 Environmental tobacco smoke. [https://www.euro.who.int/\\_\\_data/assets/pdf\\_file/0003/123087/AQG2ndEd\\_8\\_1ETS.PDF](https://www.euro.who.int/__data/assets/pdf_file/0003/123087/AQG2ndEd_8_1ETS.PDF)
- Xu, M., Yu, Z., Hu, F., Zhang, H., Zhong, L., Han, L., An, Y., Zhu, B., & Zhang, H. (2017). Identification of differential plasma miRNA profiles in Chinese workers with occupational lead exposure. *Bioscience Reports*, 37(5), BSR20171111. <https://doi.org/10.1042/BSR20171111>
- Xu, Y., Jurkovic-Mlakar, S., Li, Y., Wahlberg, K., Scott, K., Pineda, D., Lindh, C. H., Jakobsson, K., & Engström, K. (2020). Association between serum concentrations of perfluoroalkyl substances (PFAS) and expression of serum microRNAs in a cohort highly exposed to PFAS from drinking water. *Environment International*, 136, 105446. <https://doi.org/10.1016/j.envint.2019.105446>
- Yan, W., Yue, H., Ji, X., Li, G., & Sang, N. (2020). Prenatal NO<sub>2</sub> exposure and neurodevelopmental disorders in offspring mice: Transcriptomics reveals sex-dependent changes in cerebral gene expression. *Environment International*, 138, 105659. <https://doi.org/10.1016/j.envint.2020.105659>
- Zefferino, R., Piccoli, C., Ricciardi, N., Scrima, R., & Capitanio, N. (2017). Possible Mechanisms of Mercury Toxicity and Cancer Promotion: Involvement of Gap Junction Intercellular Communications and Inflammatory Cytokines. *Oxidative Medicine and Cellular Longevity*, 2017, 7028583. <https://doi.org/10.1155/2017/7028583>
- Zhang, B. Z., Hu, G. L., Lu, L. Y., Hu, S. F., Li, Y. S., Su, X., Dong, W. Y., Zhen, C. A., Liu, R. Q., Kong, F. B., Shi, M. W., & Chen, X. L. (2021). Identification of differentially expressed microRNAs under imidacloprid exposure in *Sitobion miscanthi*. *Pesticide Biochemistry and Physiology*, 177, 104885. <https://doi.org/10.1016/j.pestbp.2021.104885>
- Zhou, Y; He, L; Liu, X.D; Guan, H; Li, Y; Huang, R.X. & Zhou, P.K. (2019). Integrated Analysis of lncRNA and mRNA Transcriptomes Reveals New Regulators of Ubiquitination and the Immune Response in Silica-Induced Pulmonary Fibrosis. *Biomed Research International*, 2019, <https://doi.org/10.1155/2019/6305065>.
- Zota, A. R., Geller, R. J., Vannoy, B. N., Marfori, C. Q., Tabbara, S., Hu, L. Y., Baccarelli, A. A., & Moawad, G. N.. (2020). Phthalate Exposures and MicroRNA Expression in Uterine Fibroids: The FORGE Study. *Epigenetics Insights*, 13, 251686572090405. <https://doi.org/10.1177/2516865720904057>
